# Supplementary material for: Adding a Leafy Vegetable Fraction to Diets Decreases the Risk of Red Meat Mortality in MASLD Subjects: Results from the MICOL Cohort
Source: MDPI journal article supplement (doi:10.3390/nu16081207), 2024-04-18
Supplement: s1 [file s1]

**Table S2.** Malignant tumors (ICD-10) (*n*=171).

| Tumors *                                                   | %          |
|------------------------------------------------------------|------------|
| Lip, Oral Cavity, Pharynx, Skin and Soft Tissue            | 12 (7.02)  |
| Digestive System                                           | 66 (38.60) |
| Respiratory System and Intrathoracic Organs                | 29 (16.96) |
| Breast                                                     | 9 (5.26)   |
| Female and Male Genital Organs, and Urinary system         | 28 (16.37) |
| Lymphatic Tissue, Hematopoietic Tissue and Related Tissues | 17 (9.94)  |
| Others Tumors                                              | 10 (5.85)  |

\* As frequency and percentage (%).
