# Supplementary material for: Adding a Leafy Vegetable Fraction to Diets Decreases the Risk of Red Meat Mortality in MASLD Subjects: Results from the MICOL Cohort
Source: MDPI journal article supplement (doi:10.3390/nu16081207), 2024-04-18
Supplement: s1 [file s1]

**Table S1.** Single food composition of food groups used.

| Food Group           | Sample foods                   |
|----------------------|--------------------------------|
| (1) Red Meat         | Veal; Horse; Pork; Liver; Lamb |
| (2) Leafy Vegetables | Spinach; Chard; Chicory; Salad |
