# Supplementary figures and images for: Adding a Leafy Vegetable Fraction to Diets Decreases the Risk of Red Meat Mortality in MASLD Subjects: Results from the MICOL Cohort
Source: MDPI journal article supplement (doi:10.3390/nu16081207), 2024-04-18

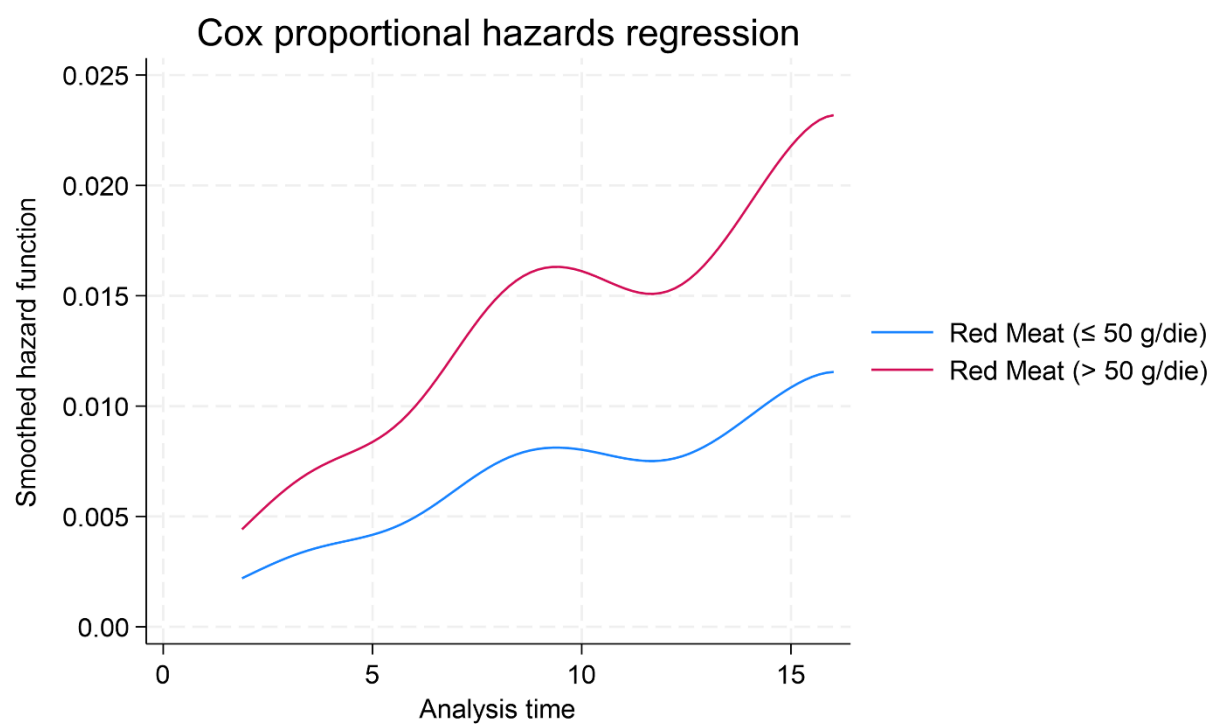

**Figure S1.** Cumulative hazard function stratified by red meat consumption.

Supplement: s1 [file s1]
